# Supplementary material for: Templated high-yield synthesis of Pt nanorods enclosed by high-index {311} facets for methanol selective oxidation
Source: Royal Society of Chemistry journal article supplement (doi:10.1039/c3ta11310h), 2013-01-01
Supplement: c3ta11310h.pdf [file c3ta11310h.pdf]

## Supporting Information

### Templated High-Yield Synthesis of Pt Nanorods Enclosed by High-Index {311} Facets for Methanol Selective Oxidation

Lini Yang,<sup>a</sup> Xuehua Song,<sup>a</sup> Menglu Qi,<sup>a</sup> Lixin Xia<sup>\*a</sup> and Mingshang Jin<sup>\*b</sup>

<sup>a</sup> College of Chemistry, Liaoning University, Shenyang, Liaoning 110036, People's Republic of China

<sup>b</sup> Center for Materials Chemistry, Frontier Institute of Science and Technology, Xi'an Jiaotong University, Xi'an, Shaanxi 710054, People's Republic of China

\*To whom correspondence should be addressed. E-mail: [jinm@mail.xjtu.edu.cn](mailto:jinm@mail.xjtu.edu.cn); [lixinxia@inu.edu.cn](mailto:lixinxia@inu.edu.cn)

#### Experimental Section

**Synthesis of SBA-15:** The mesoporous silica SBA-15 was synthesized using a literature approach. Briefly, a solution of P123 : HCl : TEOS : H<sub>2</sub>O = 2: 15 : 3.6 : 60 (mass ratio) was prepared, stirred for 24 h at 40 °C, and then heated at 100 °C for 2 days. The final products were washed, dried and calcined at 550 °C for 6 h.

**Synthesis of Pt Nanorods and Nanoparticles:** As to prepare Pt nanorods, 0.4 g of parent SBA-15 was dehydrated at 110 °C vacuum for 4 h. Then, a mixture of 2 ml aqueous solution that contains

1 ml ethylene glycol, 1 ml water, and 53 mg  $\text{H}_2\text{PtCl}_6 \cdot 6\text{H}_2\text{O}$  was infiltrated in SBA-15 by incipient wetness impregnation at room temperature. The impregnated samples was quickly transported into the oven and allowed to react at 140 °C for 60 minutes. After that, the products were then washed, dried, and collected. Finally, Pt nanorods were found to be embedded in the SBA-15 host with 4% weight loading of Pt. 3-nm Pt nanoparticles were synthesized by the similar process, but substituting ethylene glycol with glucose as the reducing reagent. Free-standing Pt nanorods and nanoparticles can be further extracted from SBA-15 template by HF etching.

### Characterization

The  $\text{N}_2$  adsorption–desorption isotherms were recorded on an ASAP 2000 instrument. TEM images were obtained with a Philips CM 200 Transmission Electron Microscope equipped with a CCD camera. XRD patterns were collected on a Rigaku D/MAX 2400 diffractometer equipped with a  $\text{CuK}\alpha$  X-ray source.

### Catalytic Measurement

The selective oxidation of methanol to methylformate (MF) was carried out in a fixed-bed quartz flow reactor under atmospheric pressure. The feed gas composition is 2% Methanol, 4%  $\text{O}_2$ , He balance. 100 mg catalysts (SBA-15 supported Pt nanorods and nanoparticles) were used for the methanol selective oxidation. It was hold for 1 hr at each evaluating temperature. The typical gas hourly space velocity is  $18000 \text{ ml g}^{-1} \text{ h}^{-1}$ . The products were analyzed by an on line gas chromatograph (Agilent 7890N) equipped with TCD and FID detectors.

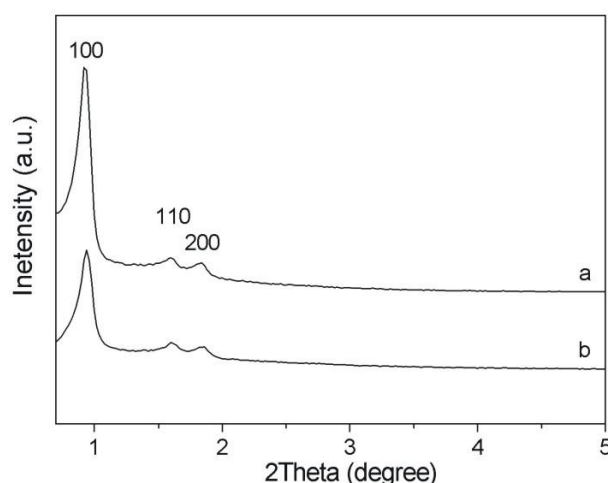

**Figure S1.** Small angle XRD patterns of (a) SBA-15 (a) before and (b) after embedding Pt nanorods.

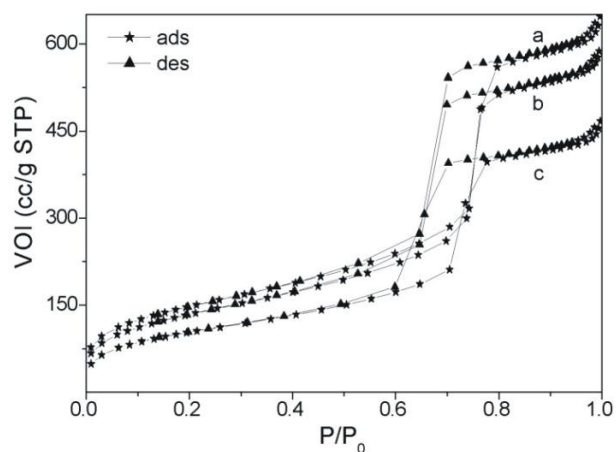

**Figure S2.** Nitrogen adsorption isotherms of (a) SBA-15, (b) Pt nanoparticles/SBA-15 and (c) Pt nanorods/SBA-15.

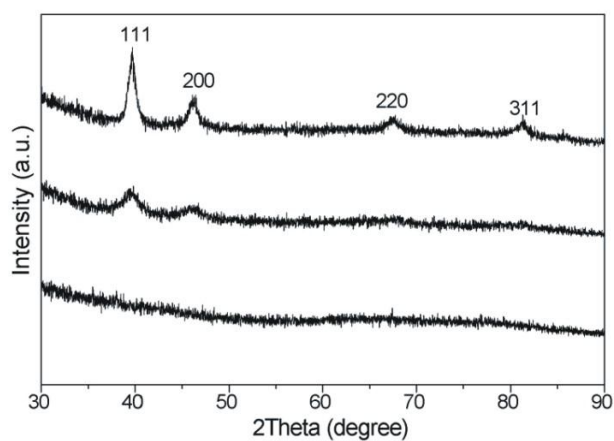

**Figure S3.** High angle XRD patterns of (a) SBA-15, and (b) Pt nanoparticles/SBA-15, (c) Pt nanorods/SBA-15.

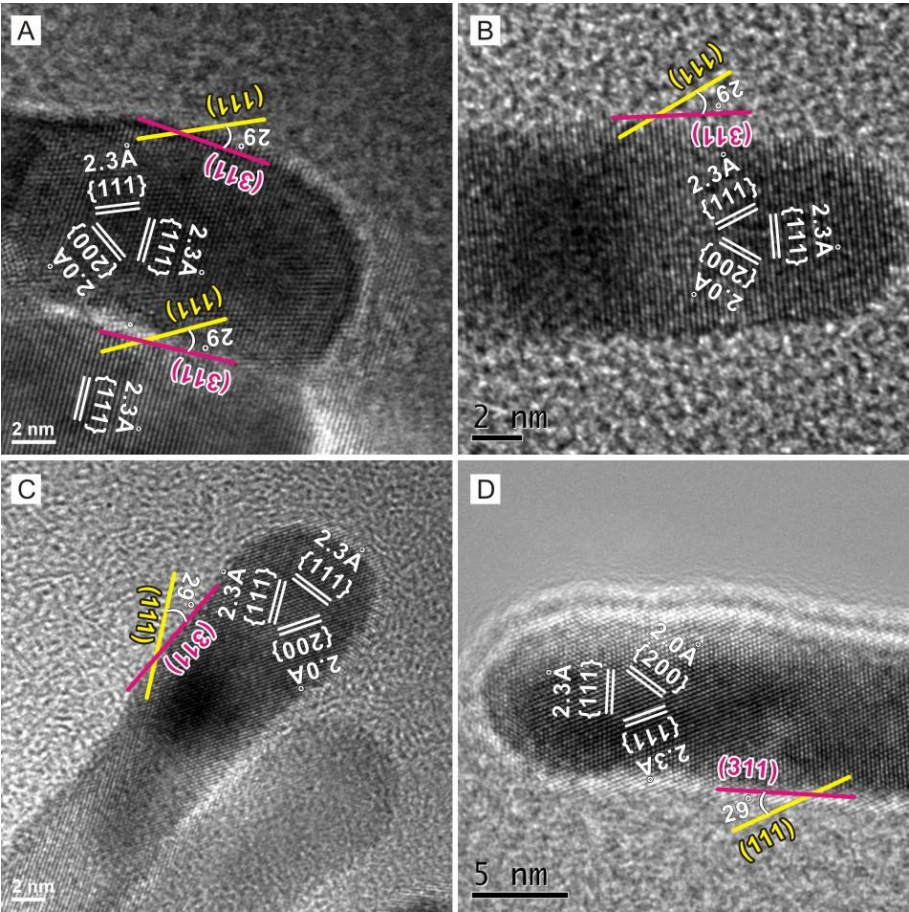

**Figure S4.** HRTEM images of Pt nanorods, all of the angles are 29°, corresponding to the calculated data (29.5°) of the angle between (111) and (311), illustrating the Pt nanorods are bounded by {311} facets.

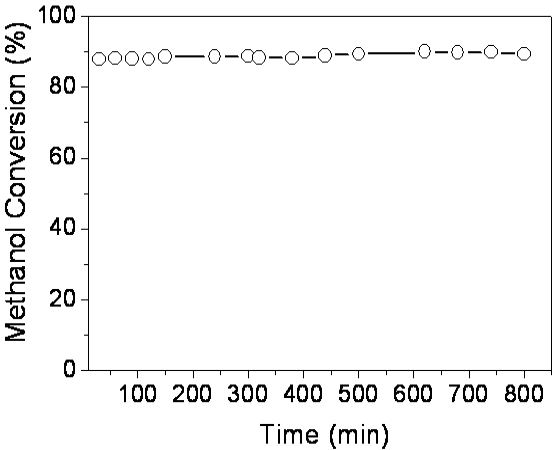

**Figure S5.** Reaction performance of SBA-15 supported Pt nanorods with time on stream.

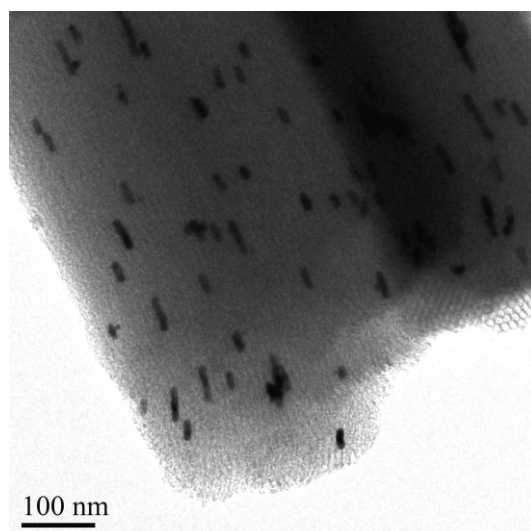

**Figure S6,** TEM image of SBA-15 supported Pt nanorods after catalytic reaction.

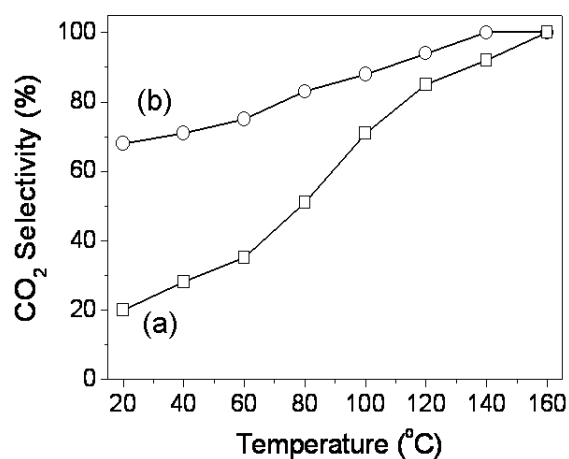

**Figure S7.** Selectivity of CO<sub>2</sub> over the SBA-15 supported Pt (a) nanorods and (b) nanoparticles catalysts.

**Table S1.** Physicochemical properties of selected samples.

| Sample                  | $S_{\text{BJH}}/\text{m}^2\text{g}^{-1}$ | $V_t/\text{m}^3\text{g}^{-1}$ | $D_{\text{pore}}/\text{nm}$ |
|-------------------------|------------------------------------------|-------------------------------|-----------------------------|
| SBA-15                  | 702                                      | 0.92                          | 6.1                         |
| Pt nanoparticles/SBA-15 | 620                                      | 0.82                          | 5.8                         |
| Pt nanorods/SBA-15      | 582                                      | 0.78                          | 5.5                         |

$S_{\text{BJH}}$ , BJH specific surface area;  $V_t$ , total pore volume;  $D_{\text{BJH}}$ , pore diameter calculated using BJH method.
